# Supplementary material
Source: PubMed Central journal article supplement (PMC5842915)
Supplement: NIHMS944814-supplement-Supplemental.pdf [file NIHMS944814-supplement-Supplemental.pdf]

# The Autophagy-related Beclin-1 Protein requires both the Coiled-coil and BARA Domains to form a Homodimer with Sub-micromolar affinity

*Matthew J. Ranaghan,<sup>1</sup> Michael A. Durney,<sup>1</sup> Michael F. Mesleh,<sup>1</sup> Patrick R. McCarren,<sup>1</sup> Colin W. Garvie,<sup>1</sup> Douglas S. Daniels,<sup>2</sup> Kimberly L. Carey,<sup>1</sup> Adam P. Skepner,<sup>1</sup> Beth Levine,<sup>3</sup> and Jose R. Perez<sup>1\*</sup>*

<sup>1</sup>Center for the Development of Therapeutics, Broad Institute of MIT and Harvard, 415 Main Street, Cambridge, MA 02142

<sup>2</sup>Department of Chemistry, University of Dayton, 300 College Park, Dayton, OH 45469

<sup>3</sup>Department of Internal Medicine and Howard Hughes Medical Institute, UT Southwestern Medical Center, Dallas, TX 75390, USA

## Supporting information

**Figure S1.** Sedimentation velocity analytical ultracentrifugation of full-length BECN1 at 10.3  $\mu$ M.

**Figure S2.** SEC-MALS of full-length BECN1.

**Figure S3.** CD thermal melts of full-length BECN1 with varying salt concentration.

**Figure S4.** Biophysical analysis of the BECN<sup>1-265</sup> and BARA constructs.

**Figure S5.** Line width and integration data for select 2D sfHMQC peaks of <sup>15</sup>N-labeled BARA spectra.

**Figure S6.** Sedimentation equilibrium analytical ultracentrifugation of the V250A/M254A/L261A mutant of full-length BECN1

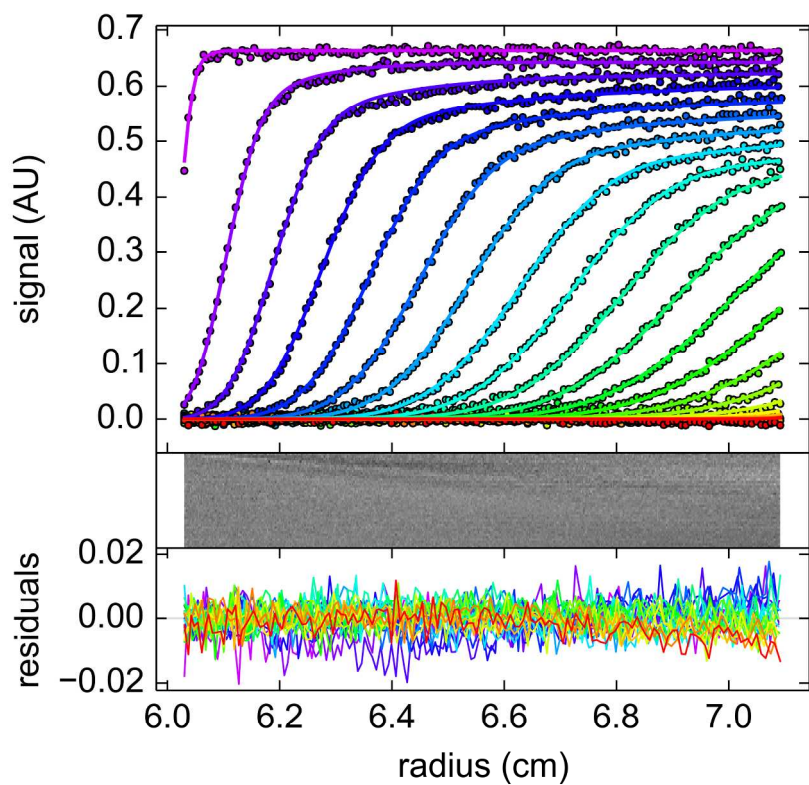

**Figure S1.** Sedimentation velocity analytical ultracentrifugation data for full-length BECN1 (10.3  $\mu\text{M}$ ) in 25 mM HEPES (pH 7.5), 150 mM NaCl, 0.5 mM TCEP at 20°C. The data were fit using a *continuous c(s)* model in SedFIT.

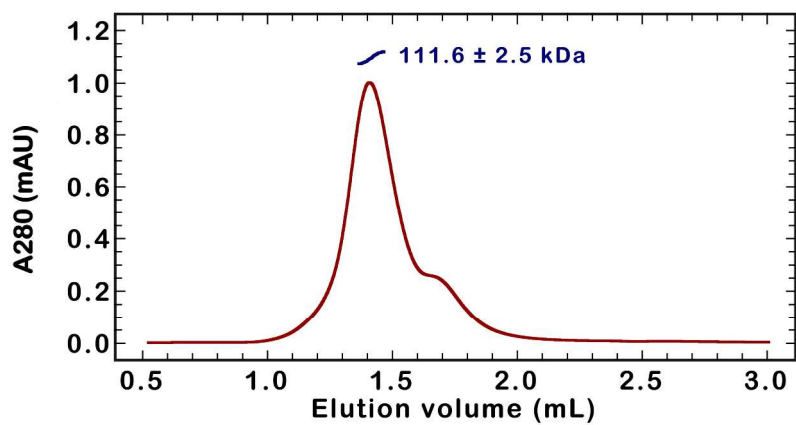

**Figure S2.** SEC-MALS of full-length BECN1 (9.6  $\mu$ M) on a Superdex 200 5/15 GL Increase column at 0.4 mL/min in 25 mM Tris (pH 8), 500 mM NaCl, 0.5 mM TCEP. An average mass of 111.6 kDa was observed.

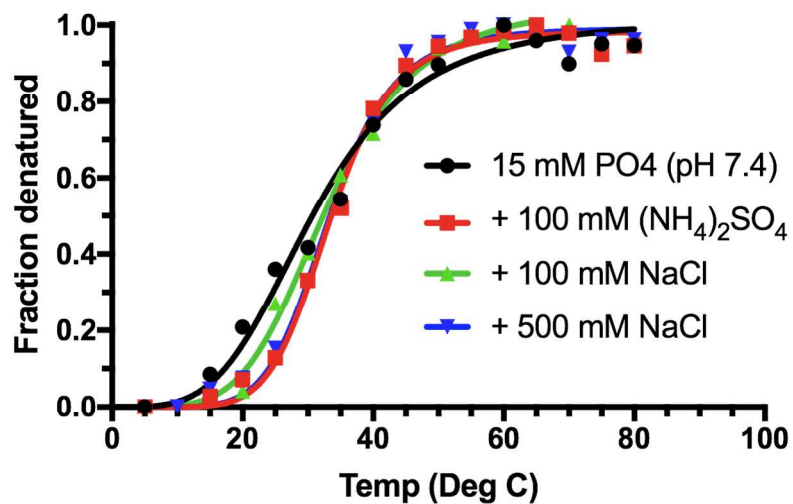

**Figure S3.** CD thermal melt of full-length BECN1 in phosphate buffer alone (*black*;  $T_M = 31^\circ\text{C}$ ), phosphate with 100 mM  $(\text{NH}_4)_2\text{SO}_4$  (*red*;  $T_M = 33^\circ\text{C}$ ), phosphate with 100 mM NaCl (*green*;  $T_M = 33^\circ\text{C}$ ), or phosphate with 500 mM NaCl (*blue*;  $T_M = 33^\circ\text{C}$ ). Experiments were conducted as described in the methods for Figure 1G.

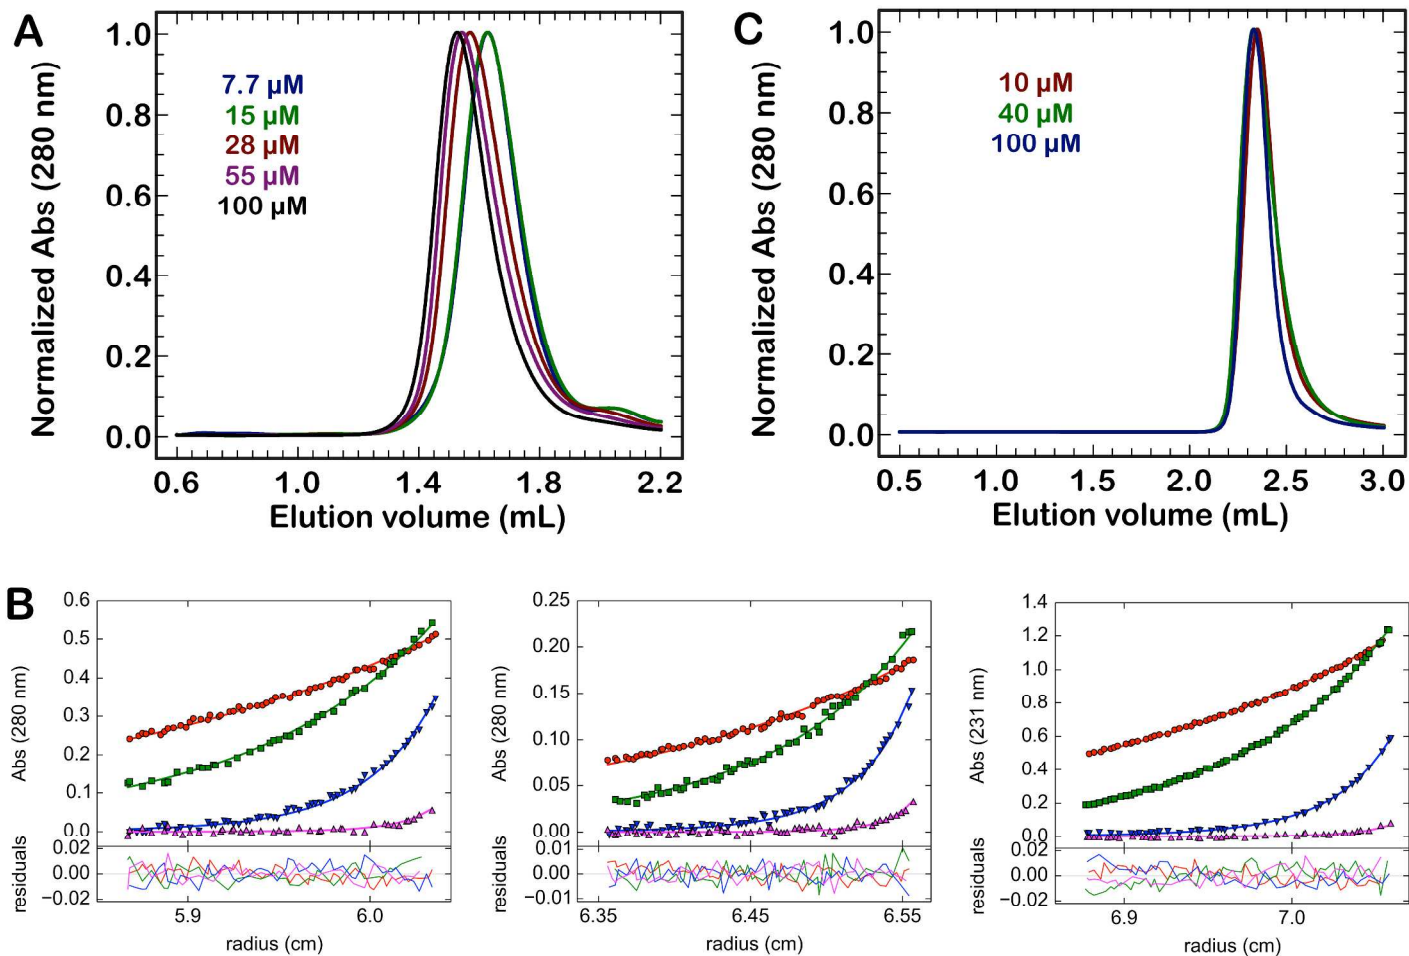

**Figure S4.** Biophysical analysis of the BECN<sup>1-265</sup> and BARA constructs. (A) SEC-MALS of the BECN<sup>1-265</sup> construct at various concentrations to determine whether a concentration-sensitive oligomerization state was present up to 100 μM. Samples were run over a Superdex 200 5/15 GL Increase column at 0.4 mL/min in 25 mM HEPES (pH 7.5), 150 mM NaCl, 0.5 mM TCEP. (B) Sedimentation equilibrium analytical ultracentrifugation of the truncated BECN<sup>1-265</sup> construct. The samples were run at 9,500 rpm (red circles), 14,500 rpm (green squares), 24,000 rpm (blue inverted triangles), or 35,000 (magenta triangles). (C) SEC-MALS of the BARA construct as described in S4A.

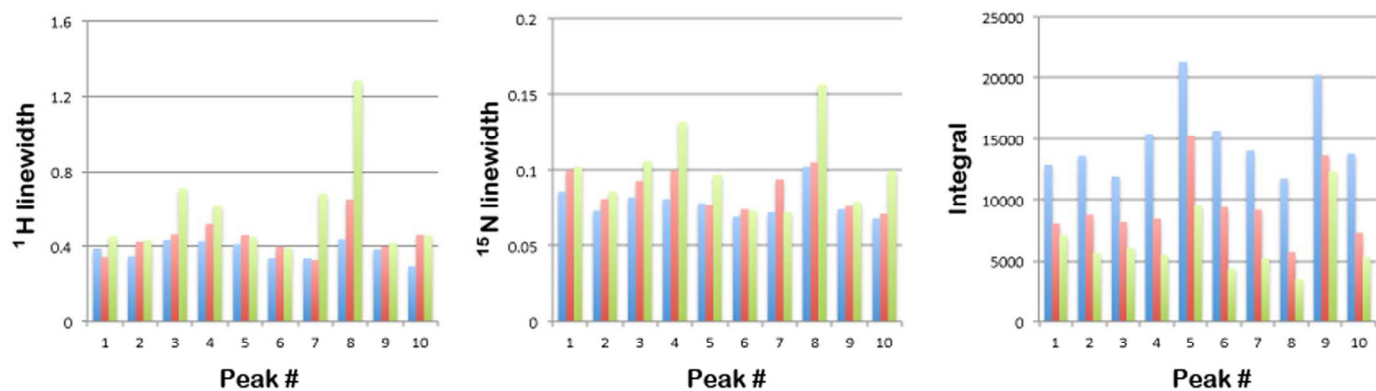

**Figure S5.** Line width and integration data for select 2D sfHMQC peaks of  $^{15}\text{N}$ -labeled BARA spectra. Spectra for the  $^{15}\text{N}$ -labeled BARA (30-25  $\mu\text{M}$ ) were collected at 298 K with 0 (blue bars), 0.5 (red bars), or 0.9 (green bars) molar equivalents of the unlabeled BECN $^{1-265}$  construct.

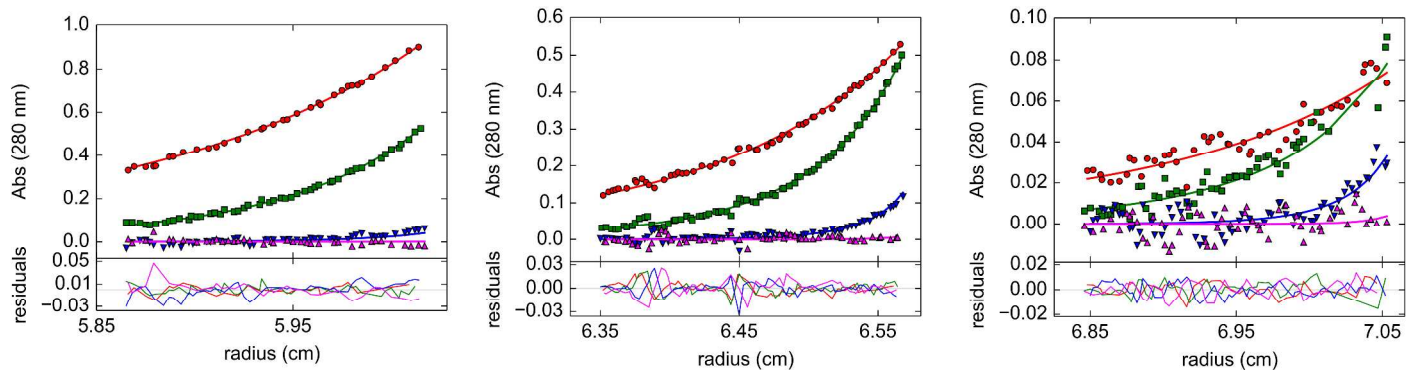

**Figure S6.** Sedimentation equilibrium analytical ultracentrifugation of the V250A/M254A/L261A mutant of full-length BECN1 at 15.4  $\mu\text{M}$  (*left*), 5.7  $\mu\text{M}$  (*center*), or 0.96  $\mu\text{M}$  (*right*). The samples were run at 9,500 rpm (red circles), 14,500 rpm (green squares), 24,000 rpm (blue inverted triangles), or 35,000 (magenta triangles).
